# Supplementary material for: Role of mTORC2 in biphasic regulation of brown fat metabolism in response to mild and severe cold
Source: PubMed Central journal article supplement (PMC8121962; doi:10.1016/j.jbc.2021.100632), 2021-04-15
Supplement: mmc1.pdf [file mmc1.pdf]

## SUPPORTING INFORMATION

### Role of mTORC2 in biphasic regulation of brown fat metabolism in response to mild and severe cold

Prasanna K. R. Allu<sup>1,4\*\*</sup>, Esther Paulo<sup>2#</sup>, Ambre M. Bertholet<sup>3</sup>, Gavin Situ<sup>1,6</sup>, Seung-Hwan Lee<sup>2,5</sup>, Yixuan Wu<sup>2</sup>, Catherine E. Gleason<sup>1,6</sup>, Bidisha Saha<sup>1</sup>, Ajay Chawla<sup>2</sup>, Biao Wang<sup>2</sup> and David Pearce<sup>1,2\*</sup>

University of California at San Francisco, San Francisco, CA, USA, <sup>1</sup>Department of Medicine, Division of Nephrology. <sup>2</sup>Cardiovascular Research Institute. <sup>3</sup>Department of Physiology.

<sup>4</sup>Current location: Joslin Diabetes Center, Harvard Medical School, Boston, MA, 02215, USA.

<sup>5</sup>Current location: Division of Endocrinology and Metabolism, Department of Internal Medicine, Seoul St. Mary's Hospital, College of Medicine, The Catholic University of Korea, Seoul 06591, Korea.

<sup>6</sup>Current location: Circle Pharma, South San Francisco, CA, 94080, USA.

# Contributed equally.

\* Co-corresponding authors:

Prasanna K. R. Allu  
Section on Integrative Physiology and Metabolism  
Joslin Diabetes Center  
Harvard Medical School  
Boston, MA, 02215  
Ph: 628-224-7537  
Prasanna.allu@joslin.harvard.edu

David Pearce  
Mission Bay, Genentech Hall, Rm N272C  
600 16<sup>th</sup> St.  
San Francisco, CA 94158  
Ph: 415-476-7015  
Fax: 415-502-8644  
david.pearce@ucsf.edu

The authors have no conflicts of interest to report.

Key words: mTOR, UCP1, cold, thermogenesis, lipogenesis, gene expression, brown adipose tissue, adipocytes.

Running title: Cold regulation of thermogenic fat.

## **SUPPLEMENTARY FIGURE LEGENDS:**

**Fig. S1. Effects of mild and severe cold on mTORC2 activity in iBAT .** Male wild type C57B6 mice (n=28) were acclimated to thermoneutrality (30 °C) for 4-weeks followed by exposure to either RT (n=14) or 4 °C (n=14) for various time points. A different set of infrared images of mice exposed to 23<sup>0</sup>C (A) or 4<sup>0</sup>C (B) for times shown. Images are displayed using the rainbow high contrast color palette in the FLiR Research IR program using a temperature linear display between 10 °C and 40 °C. C. Immunoblots showing acute responses of mild cold (RT) on phosphorylation of Akt/s473 and its substrate, lipogenic enzyme, ACLY. Note monophasic increase in both Akt/pS473 and ACLY/pS455. Bar graphs represent image quantification of Akt/pS473 normalized to total AKT (D) and ACLY/pS455 normalized to total ACLY (E). F. Immunoblots showing acute responses of severe cold (4<sup>0</sup>C) on Akt/pS473 and ACLY/pS455. Bar graphs represent image quantification of Akt/pS473 normalized to total AKT (G) and ACLY/pS455 normalized to total ACLY (H). Note biphasic effect. I-K: PKA (phosphor-PKA substrates) activities and mTORC1 (p-S6RP/S240/244) activities at RT. L-N: PKA (phosphor-PKA substrates) and p-S6RP/S240/244 at 4<sup>0</sup>C. O: BAT triglycerides are calculated in the media from BAT in response to mild (RT) or severe cold (4<sup>0</sup>C) (n=6). P. Gnas BKO mice (n=5) were acclimated to thermoneutrality for 4 weeks. After acclimatization, Gnas<sup>BKO</sup> (n=3) were exposed to 4 °C for 15 min. iBAT was assayed by western blot for Akt/pS473, total AKT, S6RP/p240-p244, total S6RP, PKA (phosphor-PKA substrates) and HSP90. Bar graphs represent image quantification of Akt/pS473 normalized to total AKT (Q) and S6RP/p240-p244 normalized to total S6RP (R). Statistical difference between groups was calculated by unpaired 2-tailed T-test, n.s. non significant, \*\*\* p<0.001.

**Fig. S2. Effect of severe cold on mTORC2 and DNL is independent of all three  $\beta$ -adrenergic receptors signaling.** Control mice (littermate controls) (n=6) and  $\beta$ -less mice (n=6) were acclimated to thermoneutrality (30 °C) for 4 weeks. After acclimatization at thermoneutrality (30 °C) for 4 weeks, controls (n=3) and  $\beta$ -less mice (n=3) were exposed to 4 °C for 1 hour, mice were euthanized, iBAT was assayed by western blot for mTORC2 (Akt/pS473), total AKT, ACLY/pS455, total ACLY, and Actin (A). Bar graphs represent image quantification of Akt/pS473 normalized to total AKT (B) and ACLY/pS455 normalized to total ACLY (C), Immunoblot for PKA (phosphor-PKA substrates) activities (D). Bar graphs represent image quantification of PKA normalized to Actin (E) and pS6RP normalized to Actin (F), Statistical difference among controls (30<sup>0</sup>C vs. 30<sup>0</sup>C to 4<sup>0</sup>C) or  $\beta$ -less animals (30<sup>0</sup>C vs. 30<sup>0</sup>C to 4<sup>0</sup>C) was calculated by unpaired 2-tailed T-test. \*p< 0.05 and \*\*p< 0.01. Note: Figs. S2A and S2D are from the same gel; actin stain is shown in both for clarity of presentation.

**Fig. S3. Cold inhibits SGK1 phosphorylation in differentiated 3T3-L1 adipocytes.** Differentiated 3T3-L1 adipocytes were treated with dexamethasone for 4 hours to increase SGK1 expression and then either exposed to room temperature (24.5 °C) or maintained at 37 °C for 4 hours. (A) Whole cell lysates were prepared and analyzed by western blot and expression levels of p-SGK (S422) and Tubulin were quantitated by densitometry. (B) Bar graph represents image quantitation of p-SGK (S422) normalized to tubulin. Statistical difference between 37 °C and RT groups was calculated by unpaired 2-tailed T-test.

**Fig. S4. IRS-1 phosphorylation is intact in cold exposed differentiated 3T3-L1 adipocytes.** Differentiated 3T3-L1 adipocytes were exposed to room temperature (24.5 °C) for 4 hours, and cell lysates were immunoprecipitated with anti-pY antibody and then immunoblotted with anti-IRS-1 antibody to detect p-Tyr IRS1 levels. (A). Whole cell lysates were also analyzed by western blot to detect IRS-1 expression levels. (B). Bar graph represents image quantitation of p-Tyr IRS-1 normalized to IRS-1. Statistical difference between 37 °C and RT groups was calculated by unpaired 2-tailed T-test.

**Fig. S5 Lowering temperature inhibit mTORC2 activity in differentiated LgT brown adipocytes.** Differentiated LgT adipocytes were adapted to 37°C and then exposed to various temperatures for 5 hours, as shown. Whole cell lysates were immunoblotted for p-AKT (S473), AKT, p-S6RP (S240/244), S6RP and Tubulin. Note that, p-AKT (S473) levels were decreased in a graded fashion at lower temperatures similar to 3T3-L1 adipocytes (A). Bar graph represent image quantitation of p-AKT (S473) normalized to AKT. Difference between groups was calculated by one-way ANOVA followed by Tukey's multiple comparison post-hoc test. \* p<0.05, \*\* p<0.01. F=39.69, p=0.002 (B).

**Fig. S6. Effects of mild cold vs. severe cold on iBAT thermogenic gene expression.** UCP1, TRPM8, Trpv1, Trpv2, Trpv3 and Trpv4 gene expression was analyzed in iBAT of mice acclimated to thermoneutrality, housed at RT, and in mice exposed to 4°C for 4 hours. 36b4 was used for internal normalization. Statistical difference between groups by unpaired 2-tailed T-test, n.s. non significant, \*p<0.05, \*\*p<0.01 and \*\*\* p<0.001 (A-F).

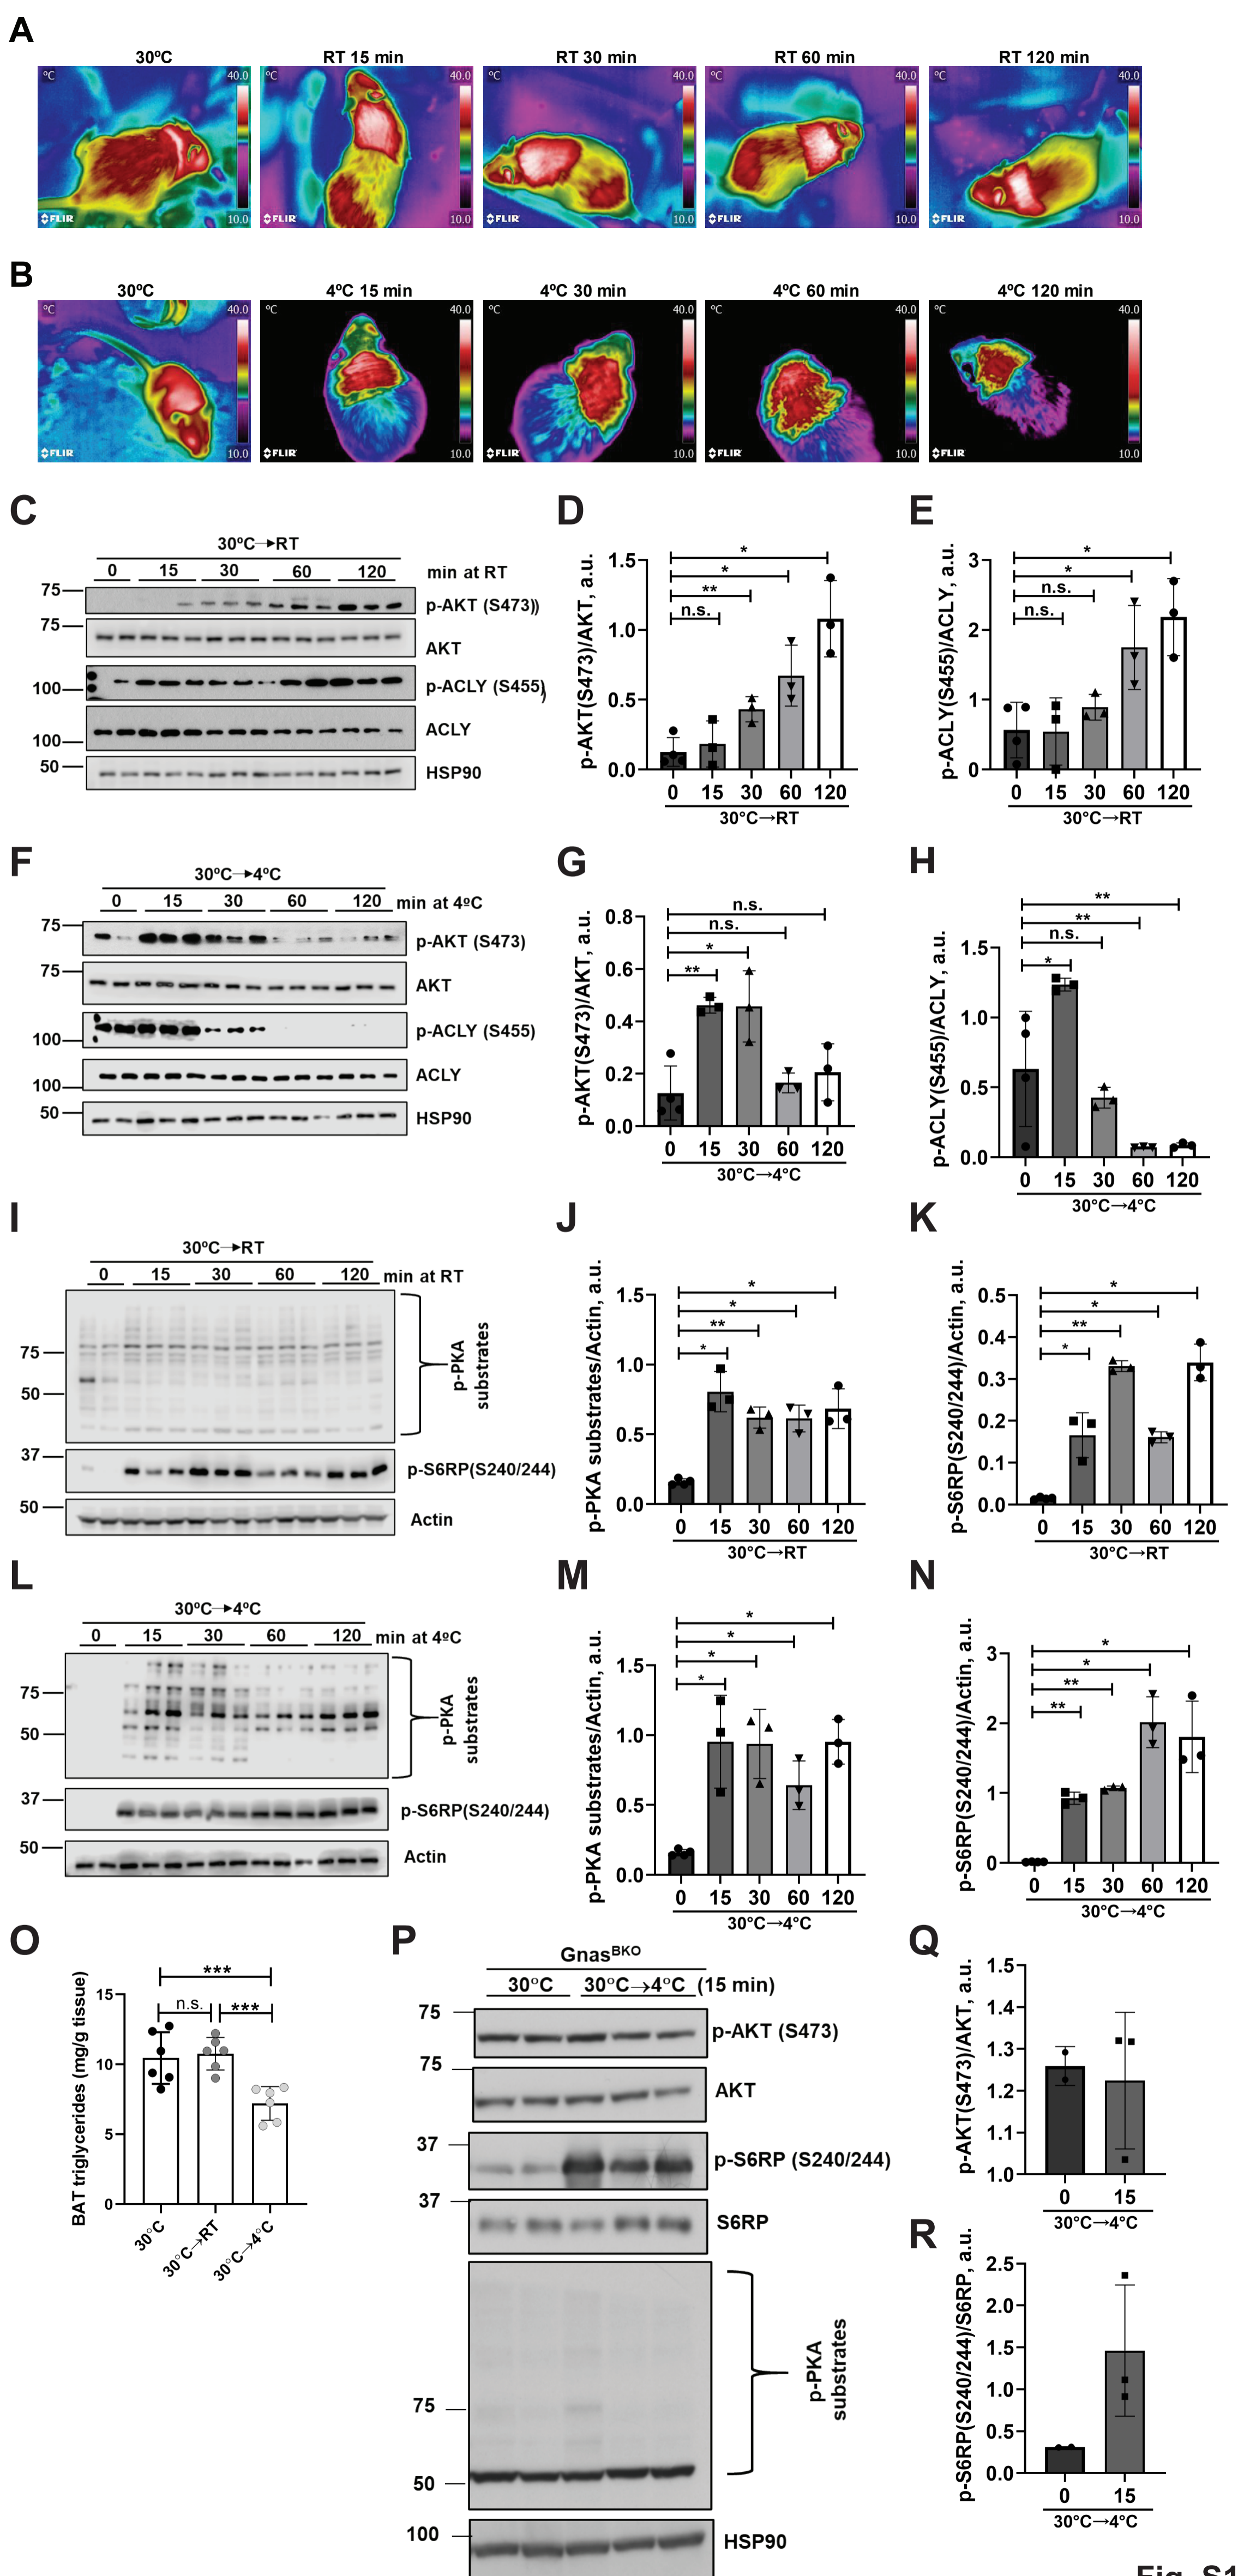

Fig. S1

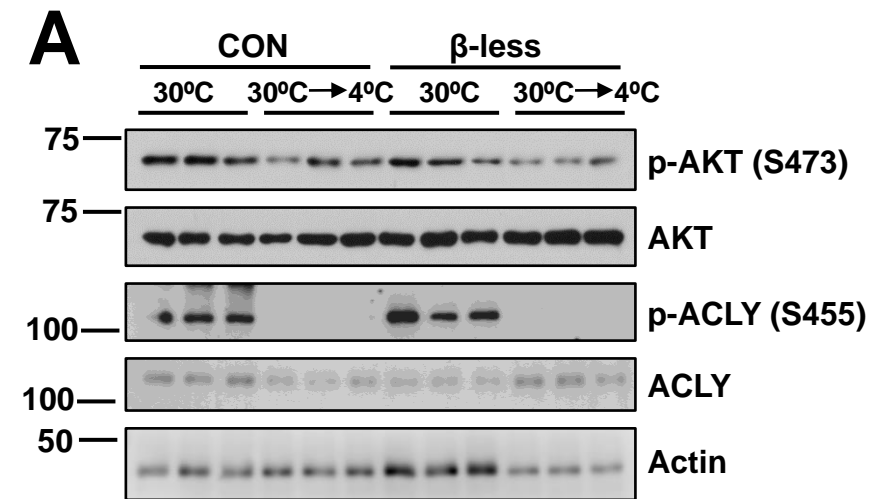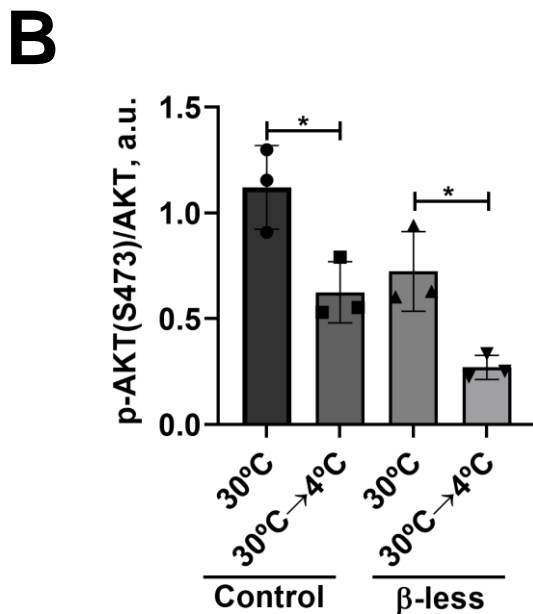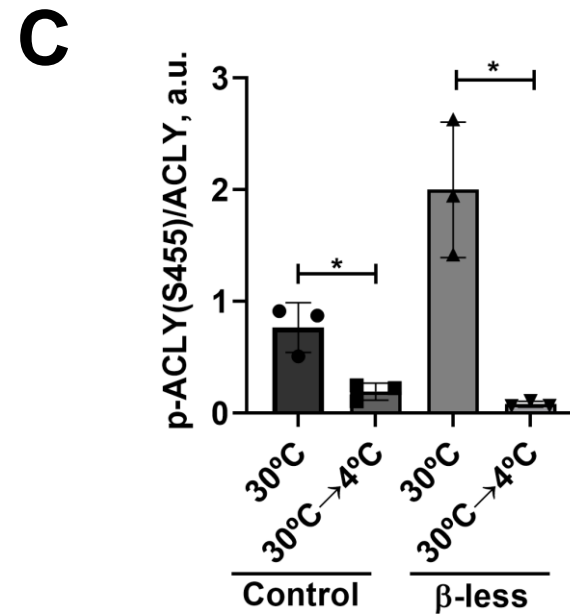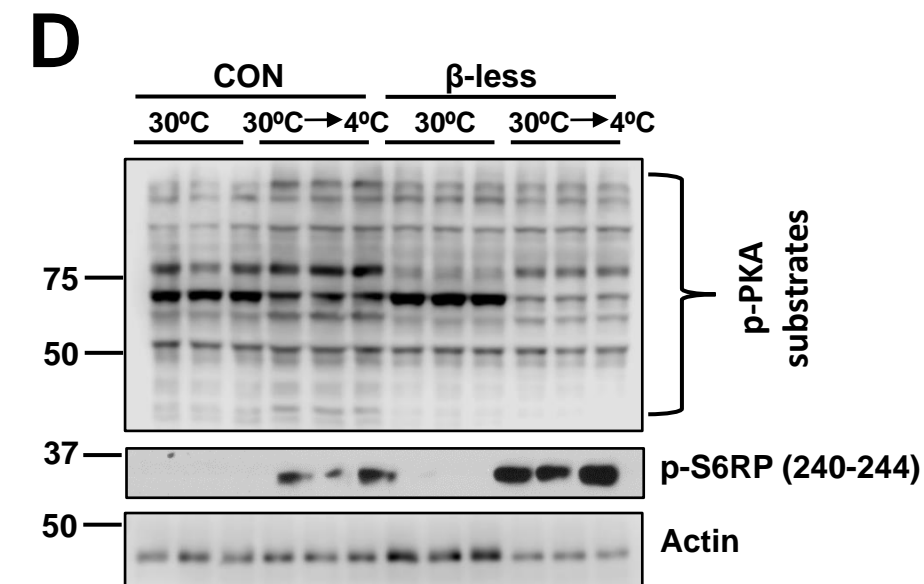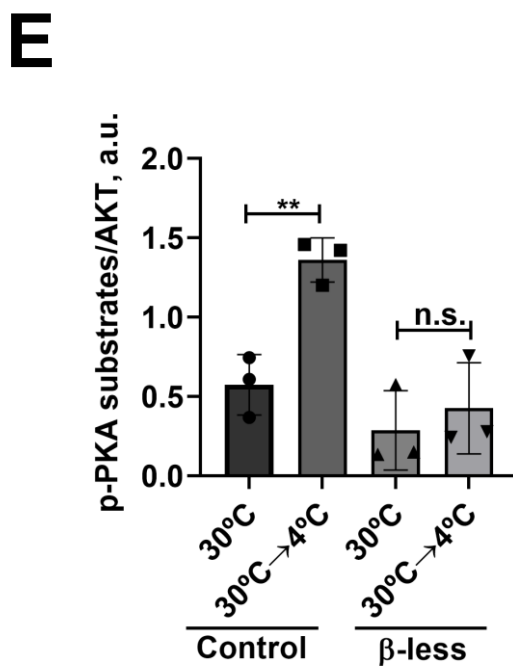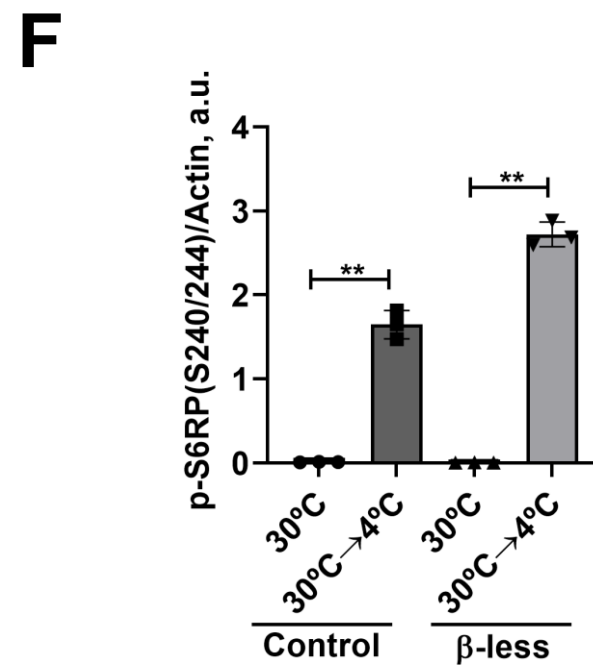

Fig. S2

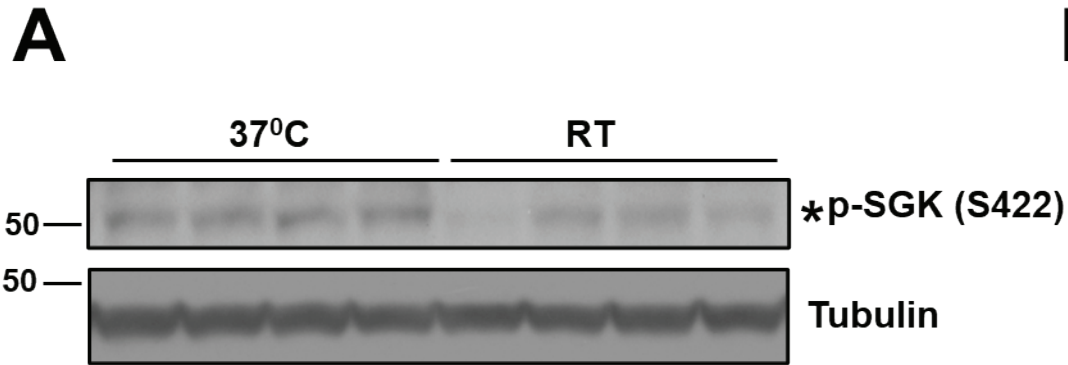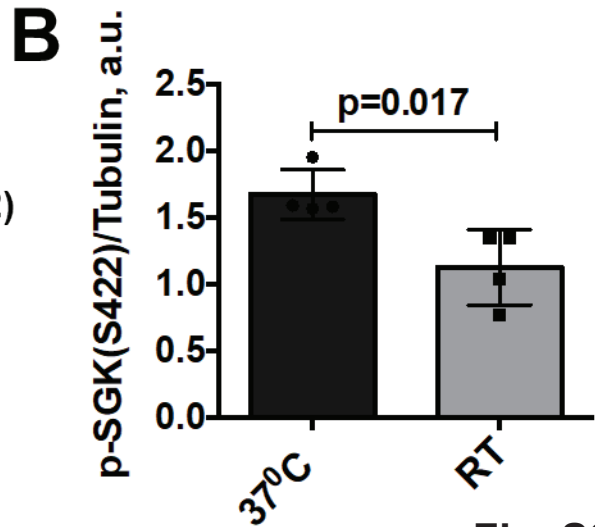

Fig. S3

**A**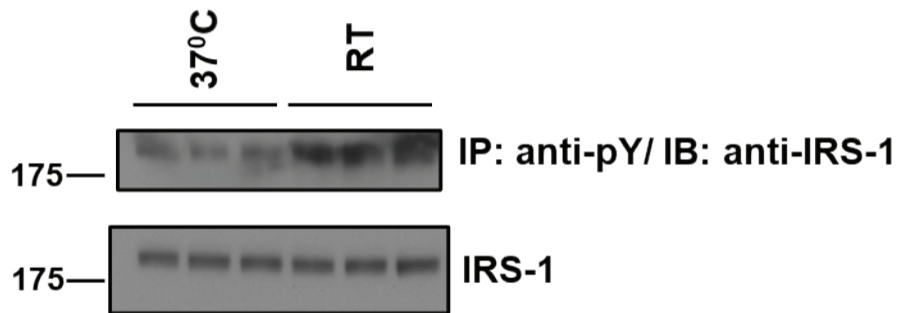**B**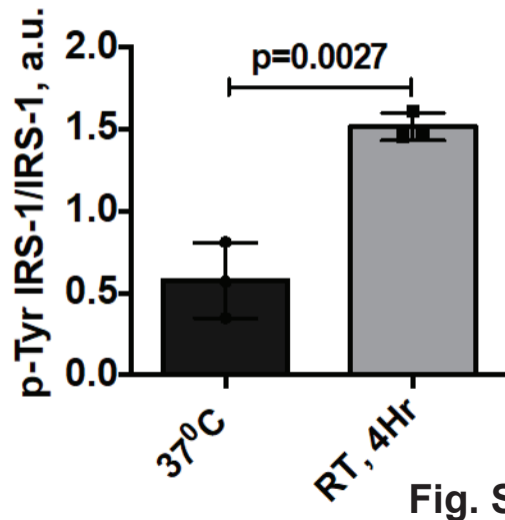

Fig. S4

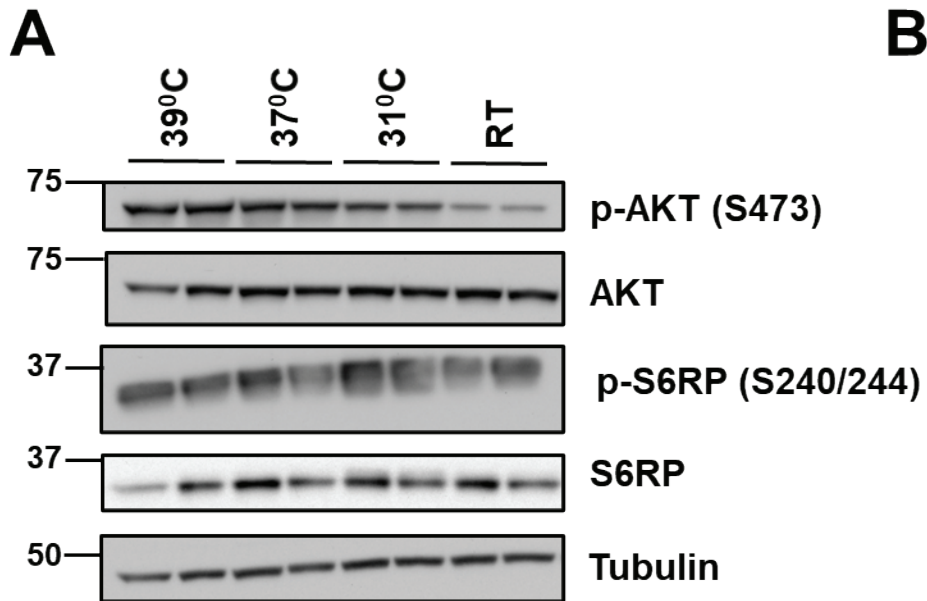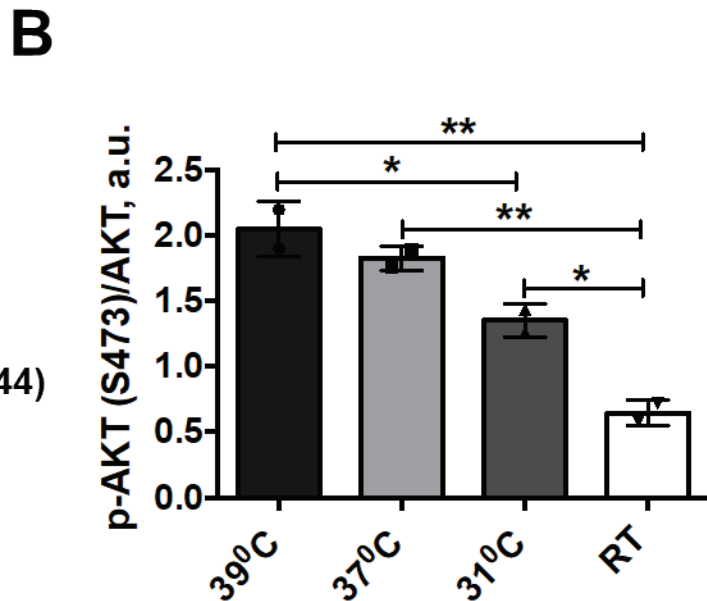

**Fig. S5**



**A**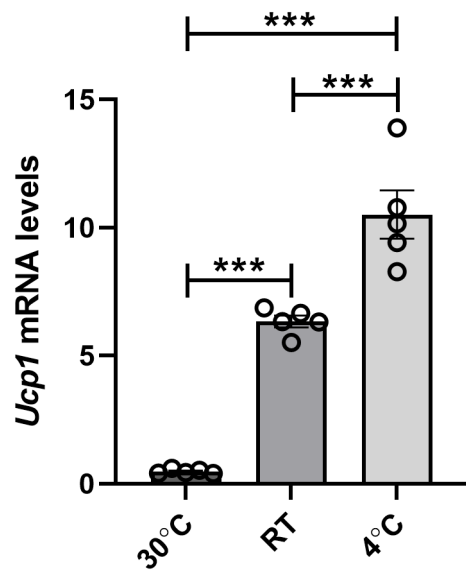**B**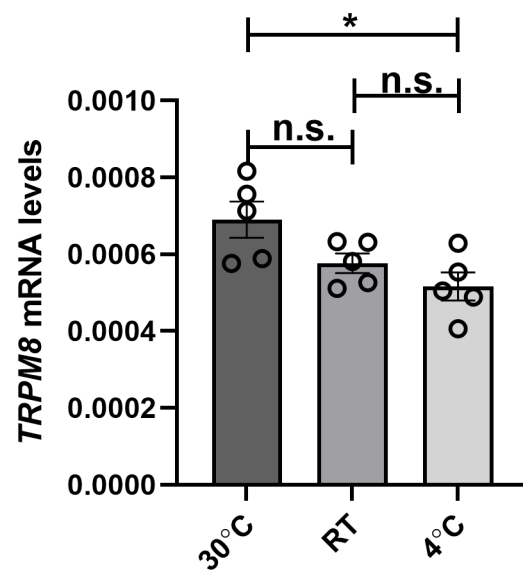**C**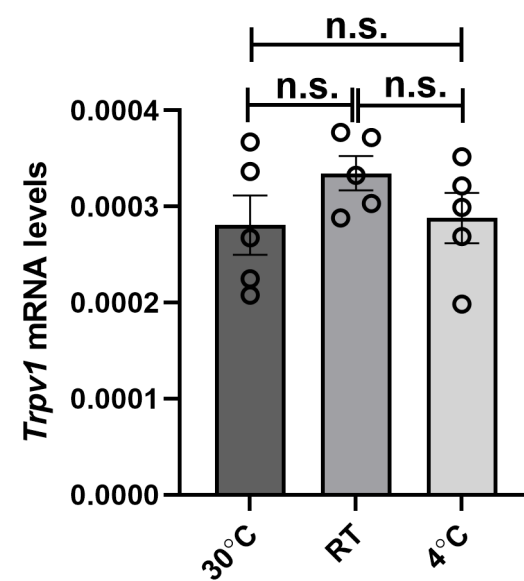**D**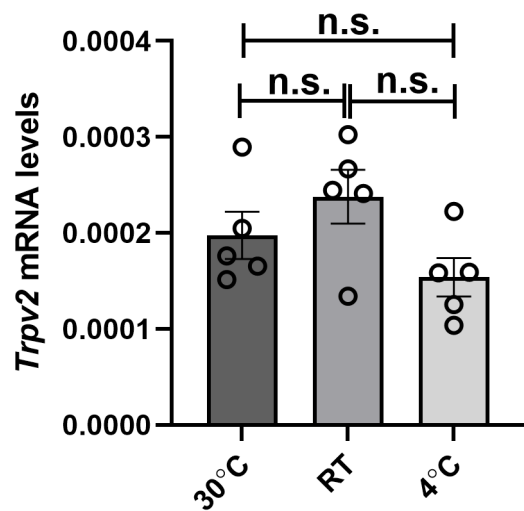**E**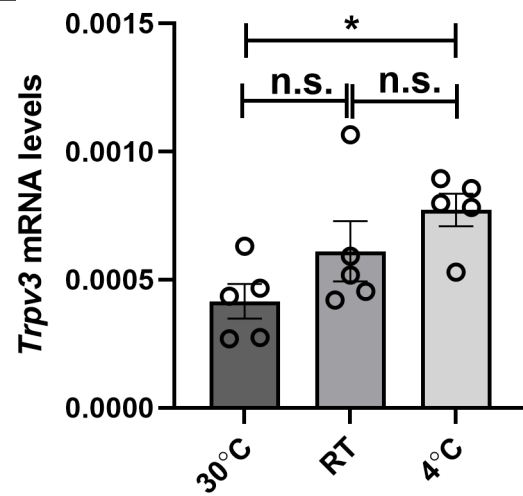**F**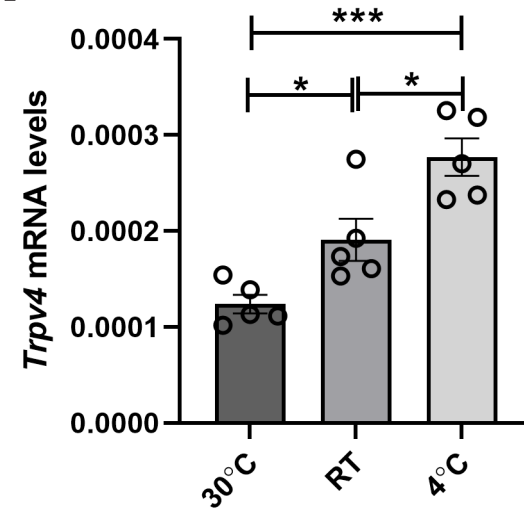**Fig. S6**
